# Supplementary material
Source: PubMed Central journal article supplement (PMC6395939)
Supplement: AAC.01780-18-s0001.pdf [file AAC.01780-18-s0001.pdf]

Supplemental Method Example 1: Method of SAAR calculation, identifying a hospital's local Risk-adjustment with application of the negative binomial regression equation.

Note: All parameter estimates used (1).

Consumption Metrics for Antimicrobials Used for Community-Acquired Infections in Adult Wards for January 2014:

AD = 127

Predicted AD = 177.67

Number Days Present = 1330

SAAR = 0.715

Negative Binomial Regression Equation:

$\text{Log}(Y) = \text{Intercept} + B1(\text{Factor 1}) + B2(\text{Factor 2}) + B3(\text{Factor 3})$

Simplified:

$Y = \exp((\text{Intercept} + B1(\text{Factor 1}) + B2(\text{Factor2}) + B3(\text{Factor3})))$

Factors and Estimates in the Model:

Facility Level: HTS, Hospital bedsize, ICU bedsize

B1 estimate = -0.376

B2 estimate = 0.122

B3 estimate = -0.202

Intercept estimate = -1.759

Factor 1 = HTS (yes/no)

Factor 2 = ICU Location (yes/no)

Factor 3 = Pediatric Location (yes/no)

Note: yes = 1, no = 0

Y = Risk-adjustment

Application:

$$\text{Log}(Y) = \text{Intercept} + B1(\text{Teaching Status}) + B2(\text{ICU Location}) + B3(\text{Pediatric Location})$$

Simplified:

$$Y = \exp(\text{Intercept}) \times \exp(B1(\text{Teaching Status})) \times \exp(B2(\text{ICU Location})) \times \exp(B3(\text{Pediatric Location}))$$

$$Y = \exp(-1.759) \times \exp(-0.376(1)) \times \exp(0.122(1)) \times \exp(-0.202(0)) = 0.1722 \times 0.6866 \times 1.129 \times 1 = \mathbf{0.133587}$$

$$\text{Or } Y = \exp((-1.759 + -0.376(1) + 0.122(1) + -0.202(0))) = 0.133587$$

The calculated Risk-adjustment is then multiplied by the institution's DP for that month (= 1330)

Thus,

$$0.133587 \times 1330 = 177.67 = \text{predicted AD}$$

$$\text{SAAR} = \text{observed AD} / \text{predicted AD} = 127/177.67 = 0.7148 \rightarrow 0.715$$

Abbreviations: NMH = Northwestern Memorial Hospital, AD = antimicrobial days, DP = days present, SAAR = Standardized Antimicrobial Administration Ratio, ICU = intensive care unit, HTS = hospital teaching status

Supplemental Method Example 2: Simplified calculation for antimicrobials used for community-acquired infections in adult ICU for hospitals A, B and C (corresponds to calculations for Tables 2 and 3).

*Simplified Risk-adjustment equation:*

$$\text{Risk-adjustment} = \exp((-1.759 + -0.376(\text{Teaching Status}) + 0.122(\text{ICU Location}) + -0.202(\text{Pediatric Location}))$$

#### How Risk-adjustment was Calculated

Hospital A (NMH): A teaching hospital with an ICU and no pediatric location.

$$\text{Risk-adjustment} = \exp((-1.759) \times \exp(B1(1)) \times \exp(B2(1)) \times \exp(B3(0)))$$

$$\text{Risk-adjustment} = \exp((-1.759 + -0.376(1) + 0.122(1) + -0.202(0)) = \mathbf{0.134}$$

Hospital B: A non-teaching hospital with an ICU and pediatric location

$$\text{Risk-adjustment} = \exp((-1.759) \times \exp(B1(0)) \times \exp(B2(1)) \times \exp(B3(1)))$$

$$\text{Risk-adjustment} = \exp((-1.759 + -0.376(0) + 0.122(1) + -0.202(1)) = \mathbf{0.159}$$

Hospital C: A non-teaching hospital with an ICU and no pediatric location

$$\text{Risk-adjustment} = \exp((-1.759) \times \exp(B1(0)) \times \exp(B2(1)) \times \exp(B3(0)))$$

$$\text{Risk-adjustment} = \exp((-1.759 + -0.376(0) + 0.122(1) + -0.202(0)) = \mathbf{0.195}$$

Supplemental Figure 1: The matched-month percent change between AD/1000DP and the SAAR from 2014 to 2016

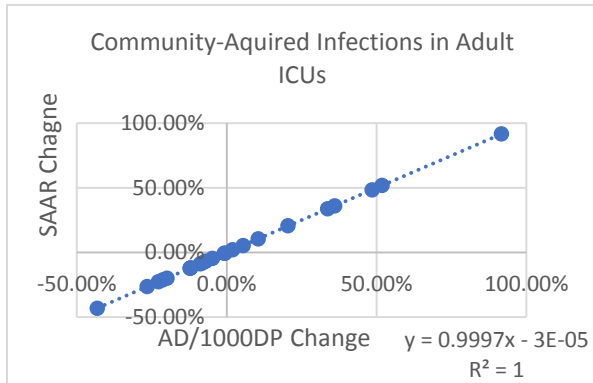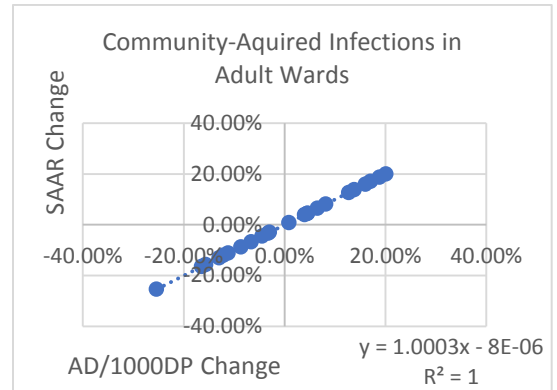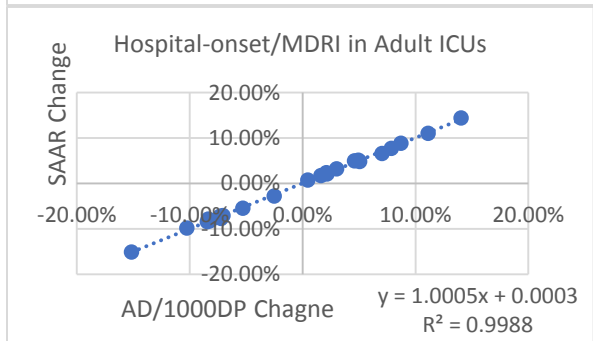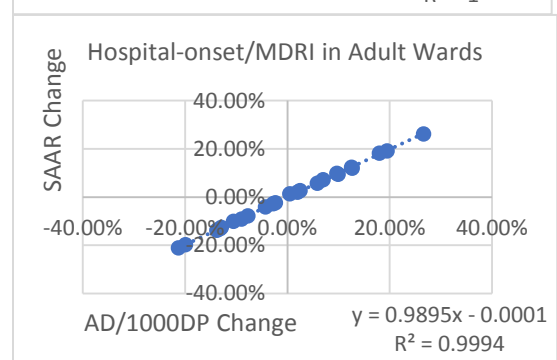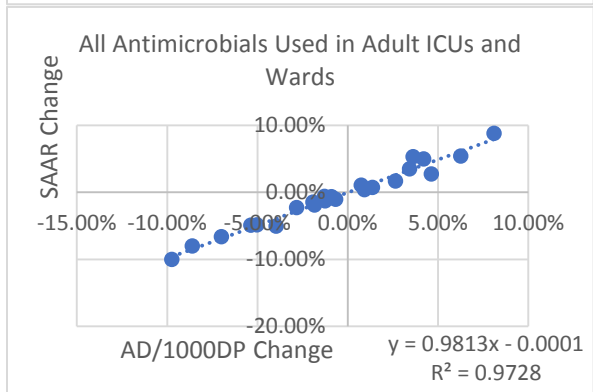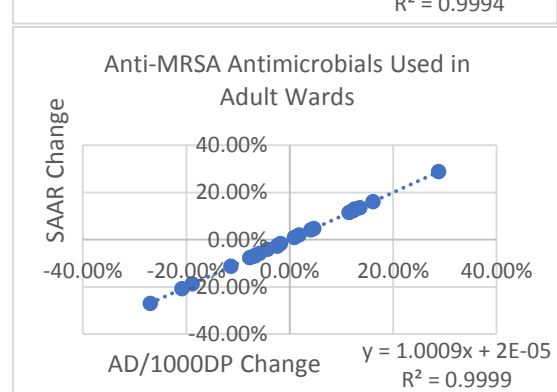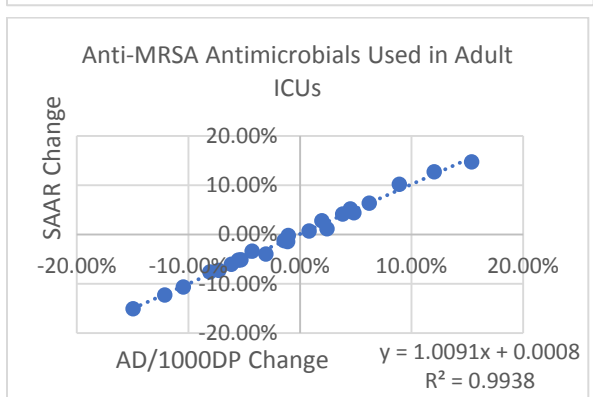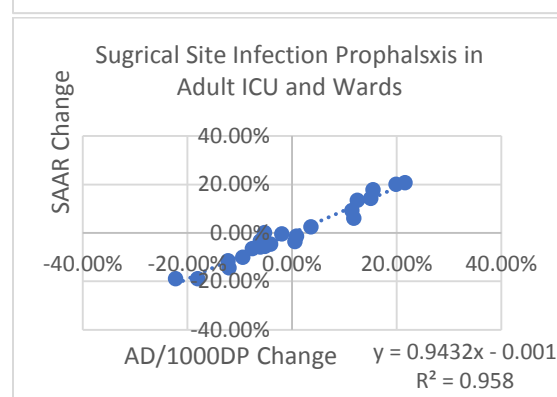

Abbreviations: AD/1000DP = Antimicrobial days per 1000 days present, SAAR = Standardized Antimicrobial Administration Ratio, MRSA = methicillin resistant staphylococcus aureus, ICU = intensive

## References:

1. **van Santen KL, Edwards JR, Webb AK, Pollack LA, O'Leary E, Neuhauser MM, Srinivasan A, Pollock DA.** 2018. The Standardized Antimicrobial Administration Ratio: A New Metric for Measuring and Comparing Antibiotic Use. *Clin Infect Dis* doi:10.1093/cid/ciy075.
